# Supplementary material for: Dynamics of inflammatory cytokine expression in bovine endometrial cells exposed to cow blood plasma small extracellular vesicles (sEV) may reflect high fertility
Source: PubMed Central journal article supplement (PMC10070242; doi:10.1038/s41598-023-32045-1), 2023-04-03

Supplementary file 3

**Prostaglandin synthases and pro-inflammatory cytokine gene expression dynamics in bovine endometrial cells exposed to cow blood plasma small extracellular vesicles (sEV) reflect the fertility breeding value.**

Pevindu Abeysinghe, Natalie Turner, Eman Mosaad, Jayden Logan and Murray D. Mitchell

Supplementary figure 3.1 Western Blot results

- BSA

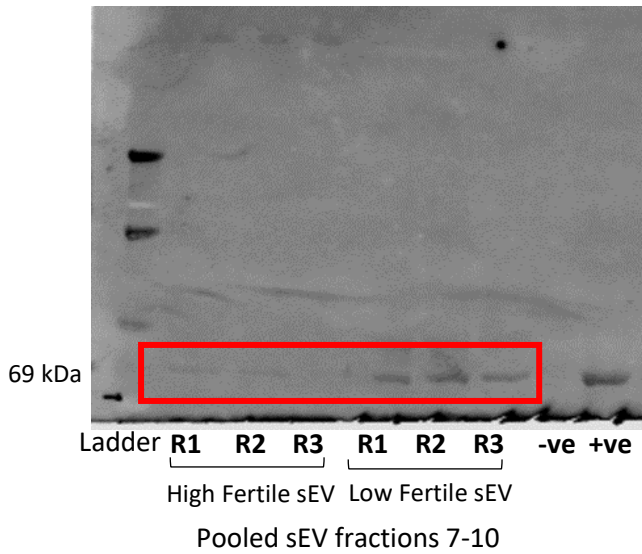

- Flotillin -1

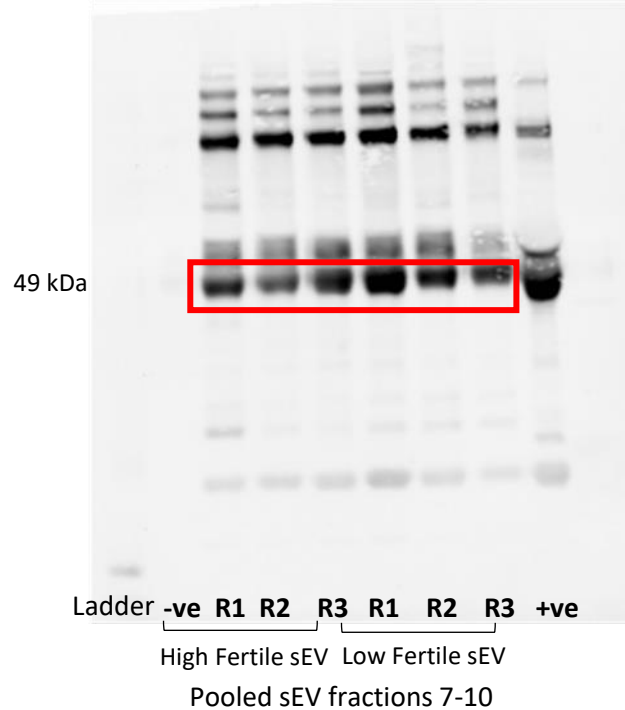

- CD81

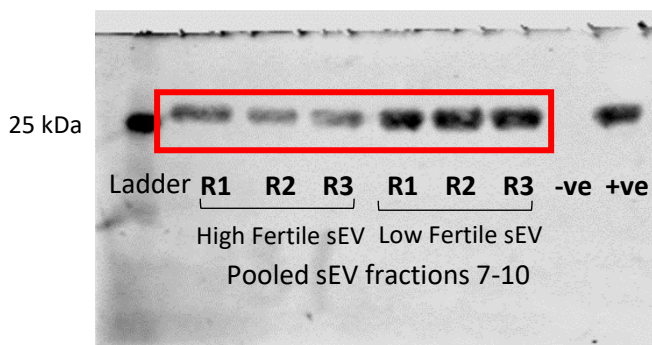

\*R1, R2 and R3 are technical replicates.

Supplementary figure 3.2

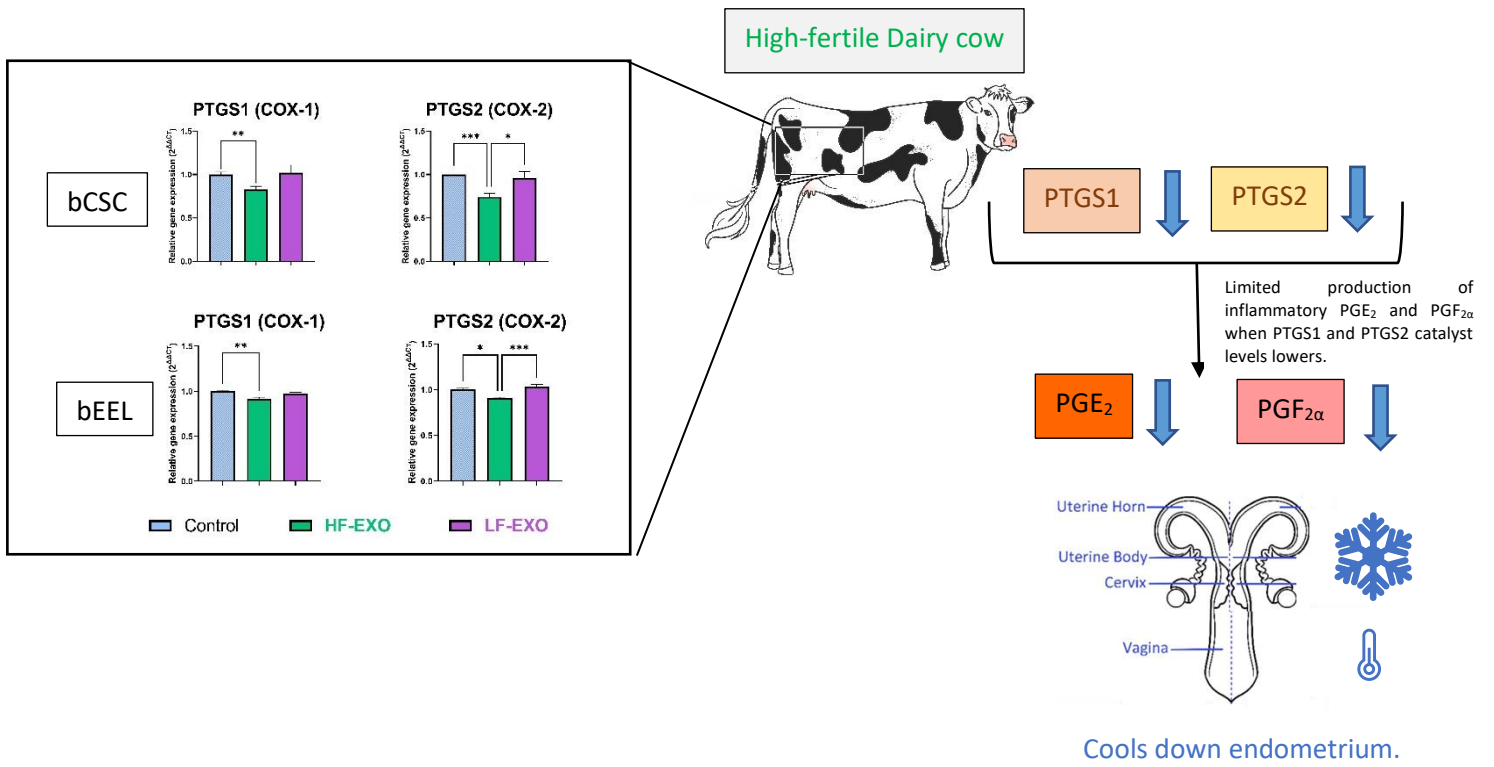

Supplement: 41598_2023_32045_MOESM3_ESM.pdf [file 41598_2023_32045_MOESM3_ESM.pdf]
